# Supplementary material for: FGF21 via mitochondrial lipid oxidation promotes physiological vascularization in a mouse model of Phase I ROP
Source: Springer Nature journal article supplement (doi:10.1007/s10456-023-09872-x), 2023-03-21
Supplement: MOESM1 [file 24656622]

## Supplementary Materials

### FGF21 via mitochondrial lipid oxidation promotes physiological vascularization in a mouse model of Phase I ROP

Zhongjie Fu<sup>1</sup>, Pia Lundgren<sup>2</sup>, Aldina Pivodic<sup>2</sup>, Jarrod Harman<sup>1</sup>, Jay Yang<sup>1</sup>, Minji Ko<sup>1</sup>, Hitomi Yagi<sup>1,3</sup>, Katherine Neilsen<sup>1</sup>, Saswata Talukdar<sup>4</sup>, Ann Hellström<sup>2</sup> and Lois E.H. Smith<sup>1,\*</sup>

<sup>1</sup>Department of Ophthalmology, Boston Children's Hospital, Harvard Medical School, Boston, MA, USA.

<sup>2</sup>The Sahlgrenska Centre for Pediatric Ophthalmology Research, Department of Clinical Neuroscience, Institute of Neuroscience and Physiology, Sahlgrenska Academy, University of Gothenburg, Gothenburg, Sweden.

<sup>3</sup>Ophthalmology, Keio University School of Medicine, Tokyo, Japan

<sup>4</sup>Merck & Co., Inc., South San Francisco, California

**\*Corresponding authors:**

Dr. Lois E.H. Smith, Department of Ophthalmology, Boston Children's Hospital, Boston, MA. 02115; telephone: (+1) 617-919-2529; email: [lois.smith@childrens.harvard.edu](mailto:lois.smith@childrens.harvard.edu)

| Variable                                                                                                                                                                                    | Total<br>N=14                         | Non-severe ROP<br>N=7                | Severe ROP<br>N=7                    | P-value |
|---------------------------------------------------------------------------------------------------------------------------------------------------------------------------------------------|---------------------------------------|--------------------------------------|--------------------------------------|---------|
| <b>Mean postnatal days 2-7</b>                                                                                                                                                              |                                       |                                      |                                      |         |
| Total energy (kcal/kg/d)                                                                                                                                                                    | 73.6±6.0<br>73 (64 - 85)<br>n=14      | 74.3±5.7<br>78 (66 - 81)<br>n=7      | 72.9±6.7<br>72 (64 - 85)<br>n=7      | 0.68    |
| Enteral energy (kcal/kg/d)                                                                                                                                                                  | 28.5±16.5<br>30 (8 - 57)<br>n=14      | 39.6±14.0<br>38 (17 - 57)<br>n=7     | 17.5±10.7<br>13 (8 - 36)<br>n=7      | 0.024   |
| Parenteral energy (kcal/kg/d)                                                                                                                                                               | 45.1±15.4<br>43 (21 - 77)<br>n=14     | 34.8±11.0<br>35 (21 - 52)<br>n=7     | 55.4±12.0<br>55 (41 - 77)<br>n=7     | 0.019   |
| Total lipid (g/kg/d)                                                                                                                                                                        | 2.83±0.61<br>2.7 (1.6 - 3.8)<br>n=14  | 3.14±0.52<br>3.3 (2.5 - 3.8)<br>n=7  | 2.53±0.56<br>2.5 (1.6 - 3.2)<br>n=7  | 0.055   |
| Enteral lipid (g/kg/d)                                                                                                                                                                      | 1.50±0.86<br>1.6 (0.4 - 3.0)<br>n=14  | 2.08±0.71<br>2.0 (0.9 - 3.0)<br>n=7  | 0.92±0.58<br>0.7 (0.4 - 1.9)<br>n=7  | 0.019   |
| Parenteral lipid (g/kg/d)                                                                                                                                                                   | 1.33±0.51<br>1.5 (0.4 - 1.9)<br>n=14  | 1.06±0.56<br>1.2 (0.4 - 1.8)<br>n=7  | 1.60±0.28<br>1.7 (1.2 - 1.9)<br>n=7  | 0.10    |
| <b>Mean postnatal days 8-14</b>                                                                                                                                                             |                                       |                                      |                                      |         |
| Total energy (kcal/kg/d)                                                                                                                                                                    | 120.5±16.7<br>118 (95 - 149)<br>n=14  | 130.6±14.2<br>133 (111 - 149)<br>n=7 | 110.5±12.9<br>112 (95 - 132)<br>n=7  | 0.017   |
| Enteral energy (kcal/kg/d)                                                                                                                                                                  | 94.6±37.7<br>99 (7 - 149)<br>n=14     | 121.8±19.2<br>120 (92 - 149)<br>n=7  | 67.3±31.3<br>67 (7 - 102)<br>n=7     | 0.002   |
| Parenteral energy (kcal/kg/d)                                                                                                                                                               | 26.0±24.5<br>16 (0 - 88)<br>n=14      | 8.8±6.1<br>9 (0 - 18)<br>n=7         | 43.2±23.9<br>37 (14 - 88)<br>n=7     | 0.008   |
| Total lipid (g/kg/d)                                                                                                                                                                        | 5.22±0.97<br>5.3 (3.1 - 7.1)<br>n=14  | 5.60±0.93<br>5.6 (4.0 - 7.1)<br>n=7  | 4.83±0.91<br>5.0 (3.1 - 5.9)<br>n=7  | 0.14    |
| Enteral lipid (g/kg/d)                                                                                                                                                                      | 4.43±1.65<br>4.8 (0.4 - 7.1)<br>n=14  | 5.47±1.02<br>5.5 (3.8 - 7.1)<br>n=7  | 3.39±1.52<br>3.4 (0.4 - 5.0)<br>n=7  | 0.019   |
| Parenteral lipid (g/kg/d)                                                                                                                                                                   | 0.78±0.87<br>0.4 (0.0 - 2.7)<br>n=14  | 0.13±0.14<br>0.2 (0.0 - 0.4)<br>n=7  | 1.44±0.79<br>1.5 (0.4 - 2.7)<br>n=7  | 0.0088  |
| <b>Mean postnatal days 15-28</b>                                                                                                                                                            |                                       |                                      |                                      |         |
| Total energy (kcal/kg/d)                                                                                                                                                                    | 131.0±18.2<br>135 (103 - 157)<br>n=14 | 141.7±18.2<br>146 (103 - 157)<br>n=7 | 120.3±10.9<br>118 (105 - 136)<br>n=7 | 0.049   |
| Enteral energy (kcal/kg/d)                                                                                                                                                                  | 109.4±43.5<br>117 (17 - 157)<br>n=14  | 135.0±35.2<br>146 (56 - 157)<br>n=7  | 83.7±36.3<br>98 (17 - 123)<br>n=7    | 0.039   |
| Parenteral energy (kcal/kg/d)                                                                                                                                                               | 21.6±27.0<br>14 (0 - 88)<br>n=14      | 6.6±17.5<br>0 (0 - 46)<br>n=7        | 36.6±27.3<br>23 (13 - 88)<br>n=7     | 0.025   |
| Total lipid (g/kg/d)                                                                                                                                                                        | 5.28±1.28<br>5.5 (3.0 - 7.1)<br>n=14  | 5.88±1.39<br>6.4 (3.0 - 7.1)<br>n=7  | 4.68±0.89<br>4.7 (3.4 - 5.9)<br>n=7  | 0.08    |
| Enteral lipid (g/kg/d)                                                                                                                                                                      | 4.83±1.90<br>5.5 (0.9 - 7.1)<br>n=14  | 5.74±1.73<br>6.4 (2.0 - 7.1)<br>n=7  | 3.91±1.70<br>4.3 (0.9 - 5.7)<br>n=7  | 0.06    |
| Parenteral lipid (g/kg/d)                                                                                                                                                                   | 0.45±0.75<br>0.1 (0.0 - 2.5)<br>n=14  | 0.14±0.36<br>0.0 (0.0 - 1.0)<br>n=7  | 0.77±0.93<br>0.2 (0.0 - 2.5)<br>n=7  | 0.13    |
| Data are presented as mean±standard deviation, median (range) and number of observations.<br>For test between two groups with respect to continuous variables Mann-Whitney U-test was used. |                                       |                                      |                                      |         |

**Supplementary Table 1: Nutritional intake in preterm infants with severe ROP versus no severe ROP.**

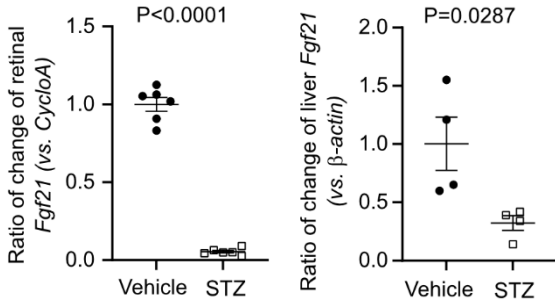

**Supplementary Figure 1.** Retinal and liver mRNA expression of FGF21 at P10 was decreased in mouse pups with hyperglycemia-induced suppression of physiological vascular development modeling Phase I ROP. mRNA expression of *Fgf21* was compared to the internal control (*CycloA* for retina,  $\beta$ -actin for liver) n=6 replicates per group (retina. 6 retinas pooled as n=1), n=4 mice per group (liver). Normality (quantile-quantile plot) and F-test was first conducted and unpaired t-test (liver) or Welch's t-test (retina) was used to compare the groups.

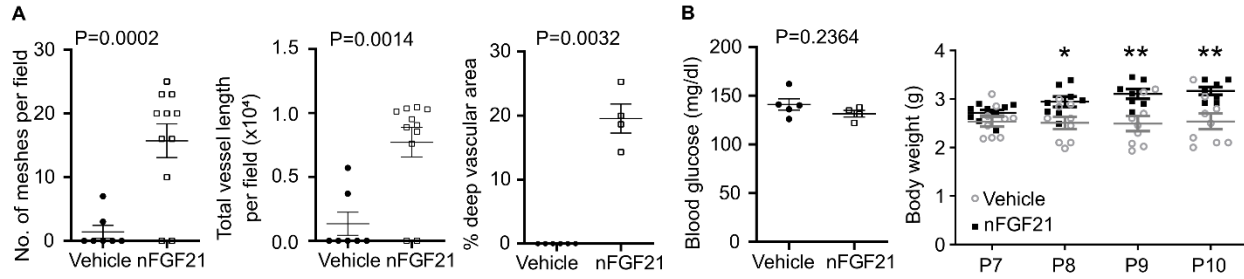

**Supplementary Figure 2. (A)** Native FGF21 (1mg/kg, ip, daily from P7-9) vs. littermate vehicle treatment promoted retinal vessel growth at P10. n=4-11 retinas per group. Normality (quantile-quantile plot) and F-test was first conducted and unpaired t-test or Welch's t-test was used to compare the groups. **(B)** Weight gain in runty pups (2.0 to 3.5 gram at P10). n=7-9 mice per group. Multiple t-test. \*P<0.05, \*\*P<0.01.

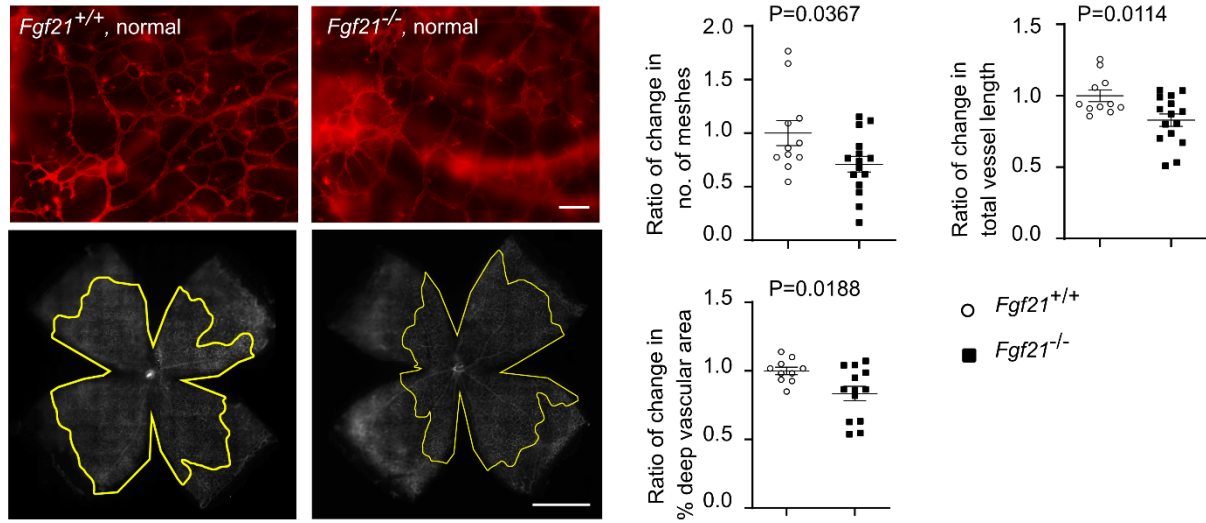

**Supplementary Figure 3.** FGF21 deficiency delayed physiological retinal vascular development. Decreased retinal vascular network parameters were found in  $Fgf21^{-/-}$  (knockout) vs. littermate  $Fgf21^{+/+}$  (WT) mice during normal development at P10. The outlined area (in yellow, bottom) represents the vascular area in the deep plexus. Scale bar: 50 $\mu$ m (top), 1mm (bottom). n=10-15 retinas per group. Normality (quantile-quantile plot) and F-test was first conducted and unpaired t-test was used to compare the groups.

**A**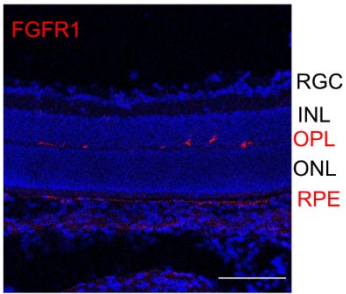**B**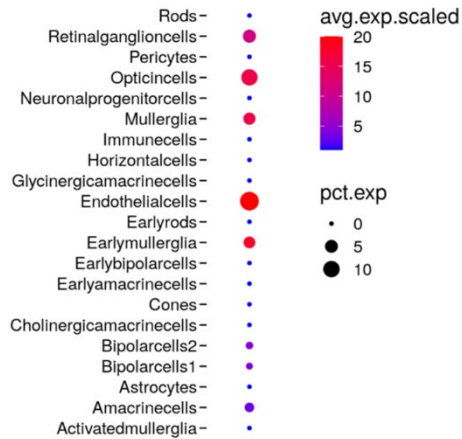

**Supplementary Figure 4.** Localization of FGFR1 in neonatal mouse retina. **(A)** IHC of FGFR1 (red) on P10 C57BL/6J mouse retina. Blue, DAPI for nucleus. Scale bar, 100 $\mu$ m. **(B)** gene expression of *Fgfr1* at P12 C57BL/6J mouse retinas using Vision Health Research Network Single-Cell Computational platform (<https://genap.ca/>). Per exp = percent of cells with one or more transcripts for the gene of interest. Avg exp = average transcript count among the cells of a cluster. Transcript counts are scaled around zero (zero = mean across all cells of the dataset).

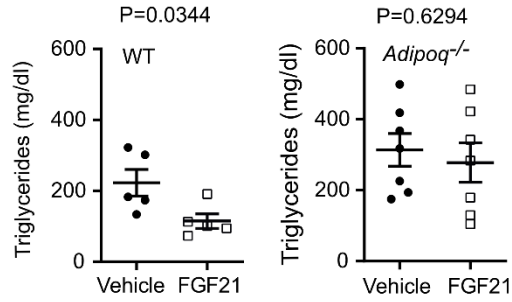

**Supplementary Figure 5.** FGF21 (PF-05231023) decreased circulating triglyceride in WT mice (n=5 per group), and the impact was abolished in *Adipoq*<sup>-/-</sup> mice (n=7 mice per group) at P10 in hyperglycemia-associated Phase I ROP model. Normality (quantile-quantile plot) and F-test was first conducted and unpaired t-test was used to compare the groups.
